# Supplementary material for: 3-nitropyridine analogues as novel microtubule-targeting agents
Source: PubMed Central journal article supplement (PMC11542830; doi:10.1371/journal.pone.0307153), 2024-11-07

A

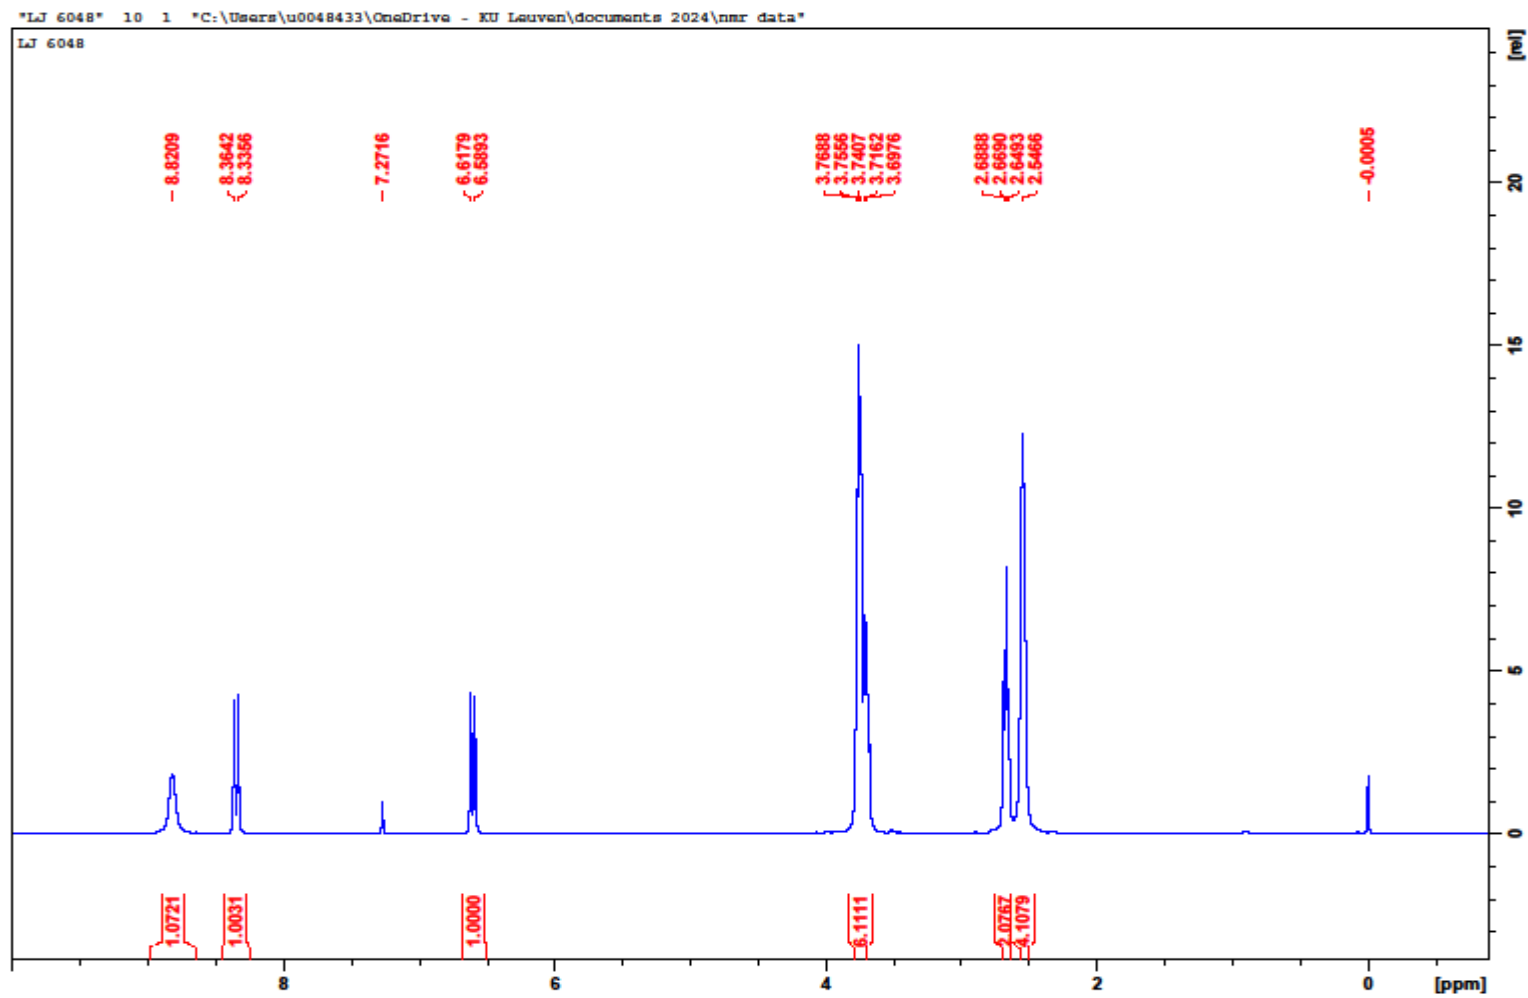

B

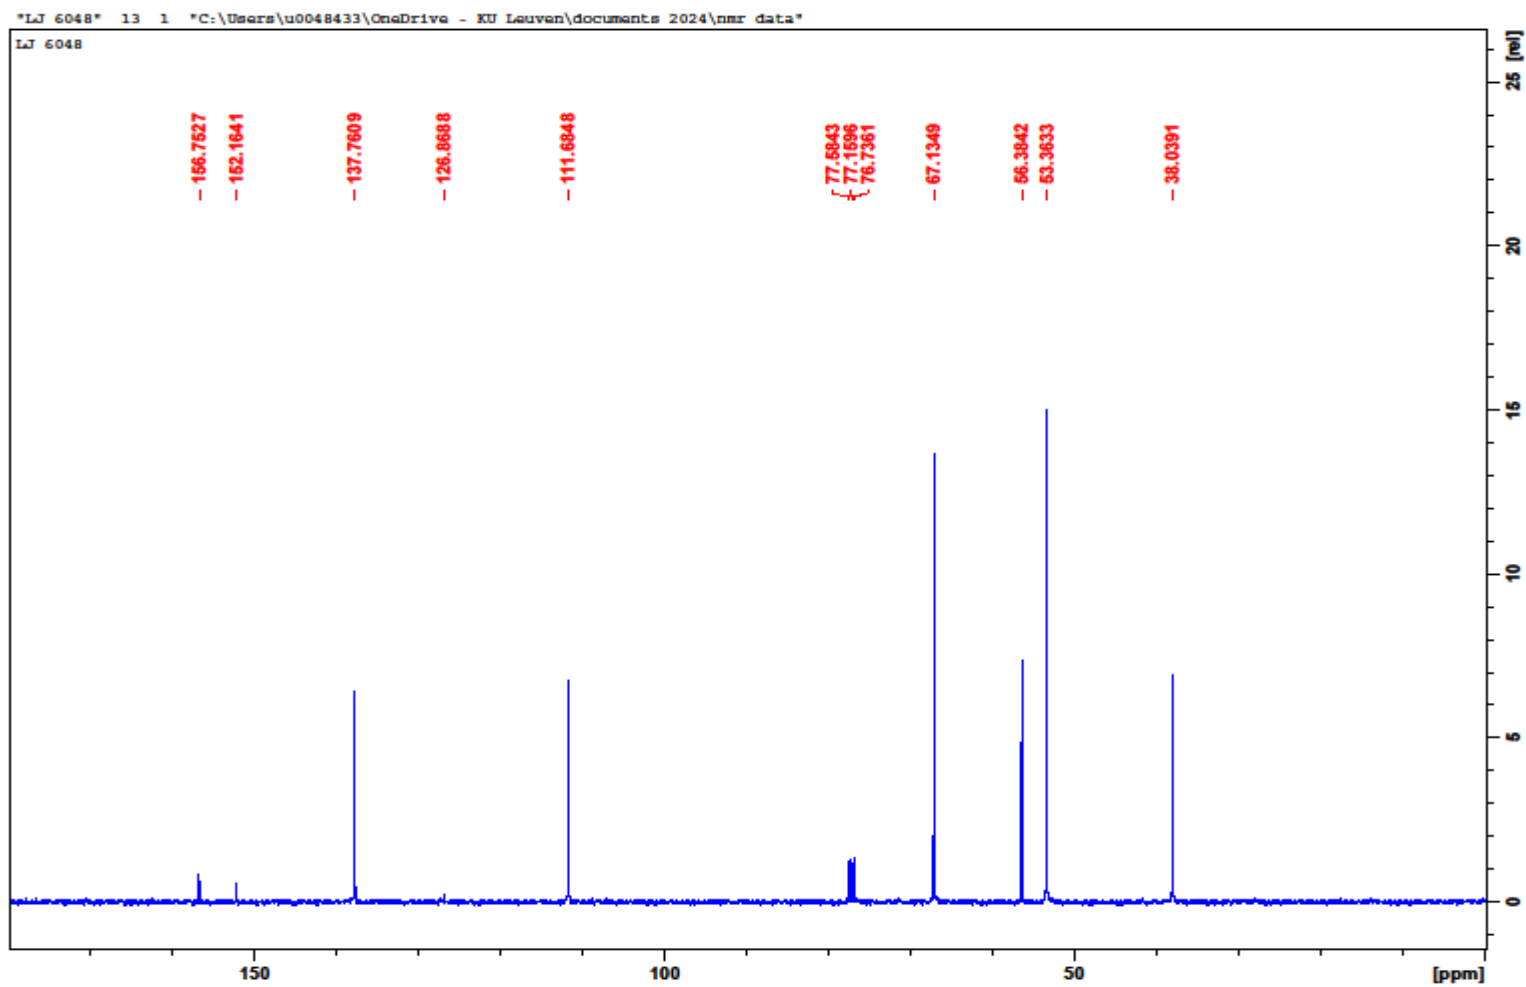

C

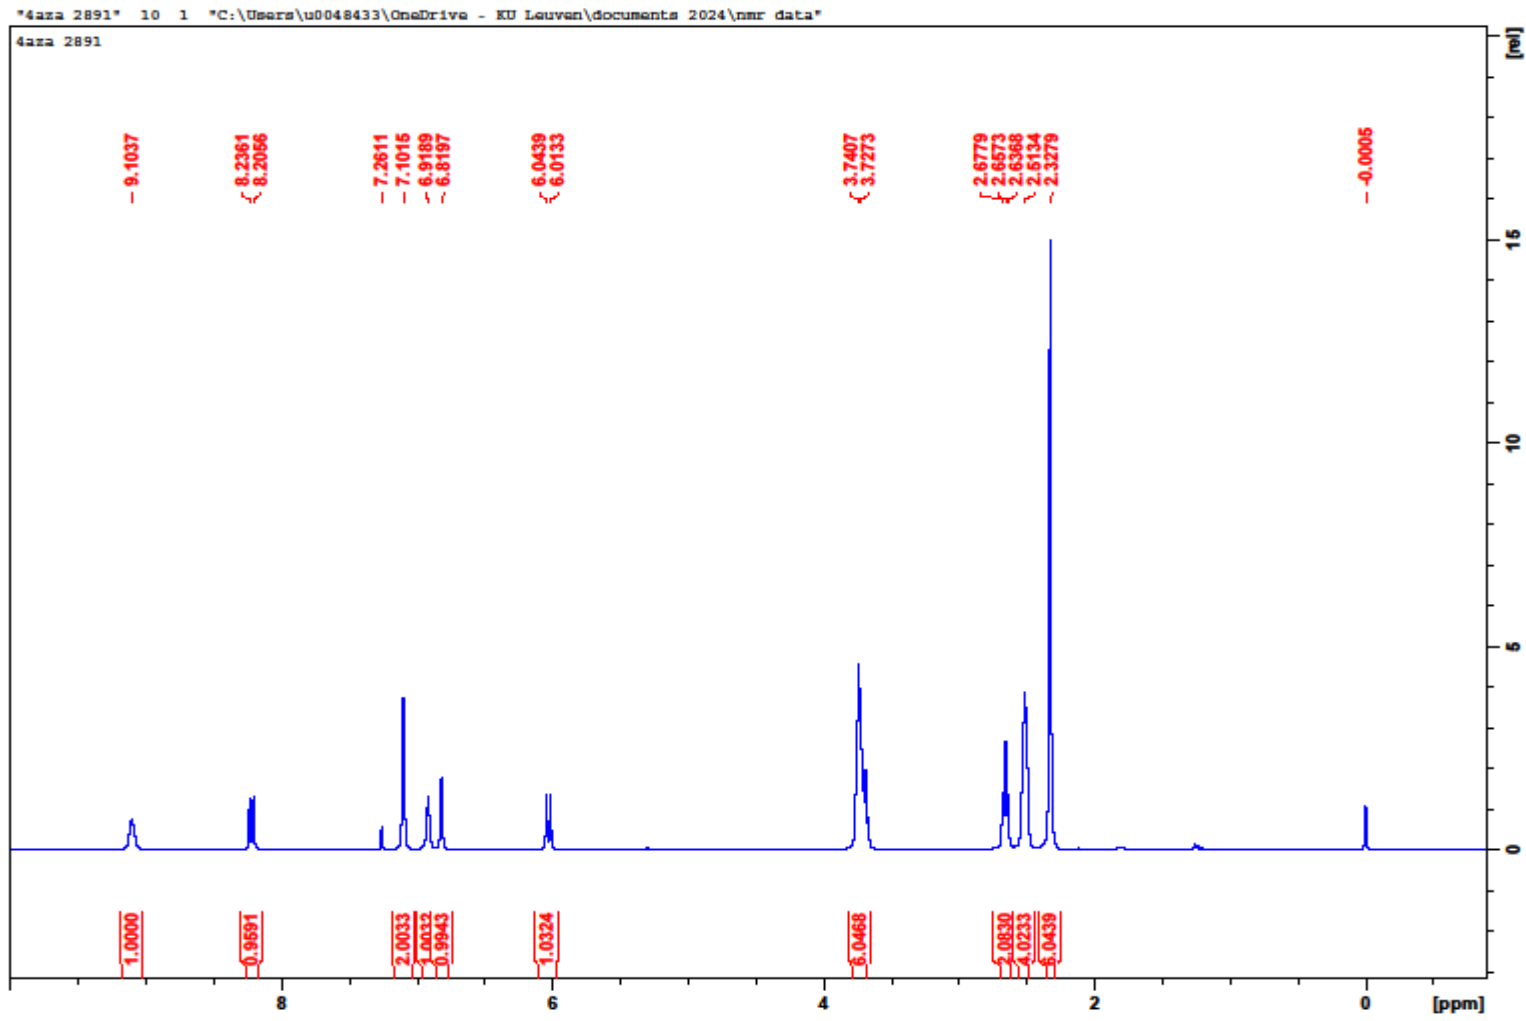

D

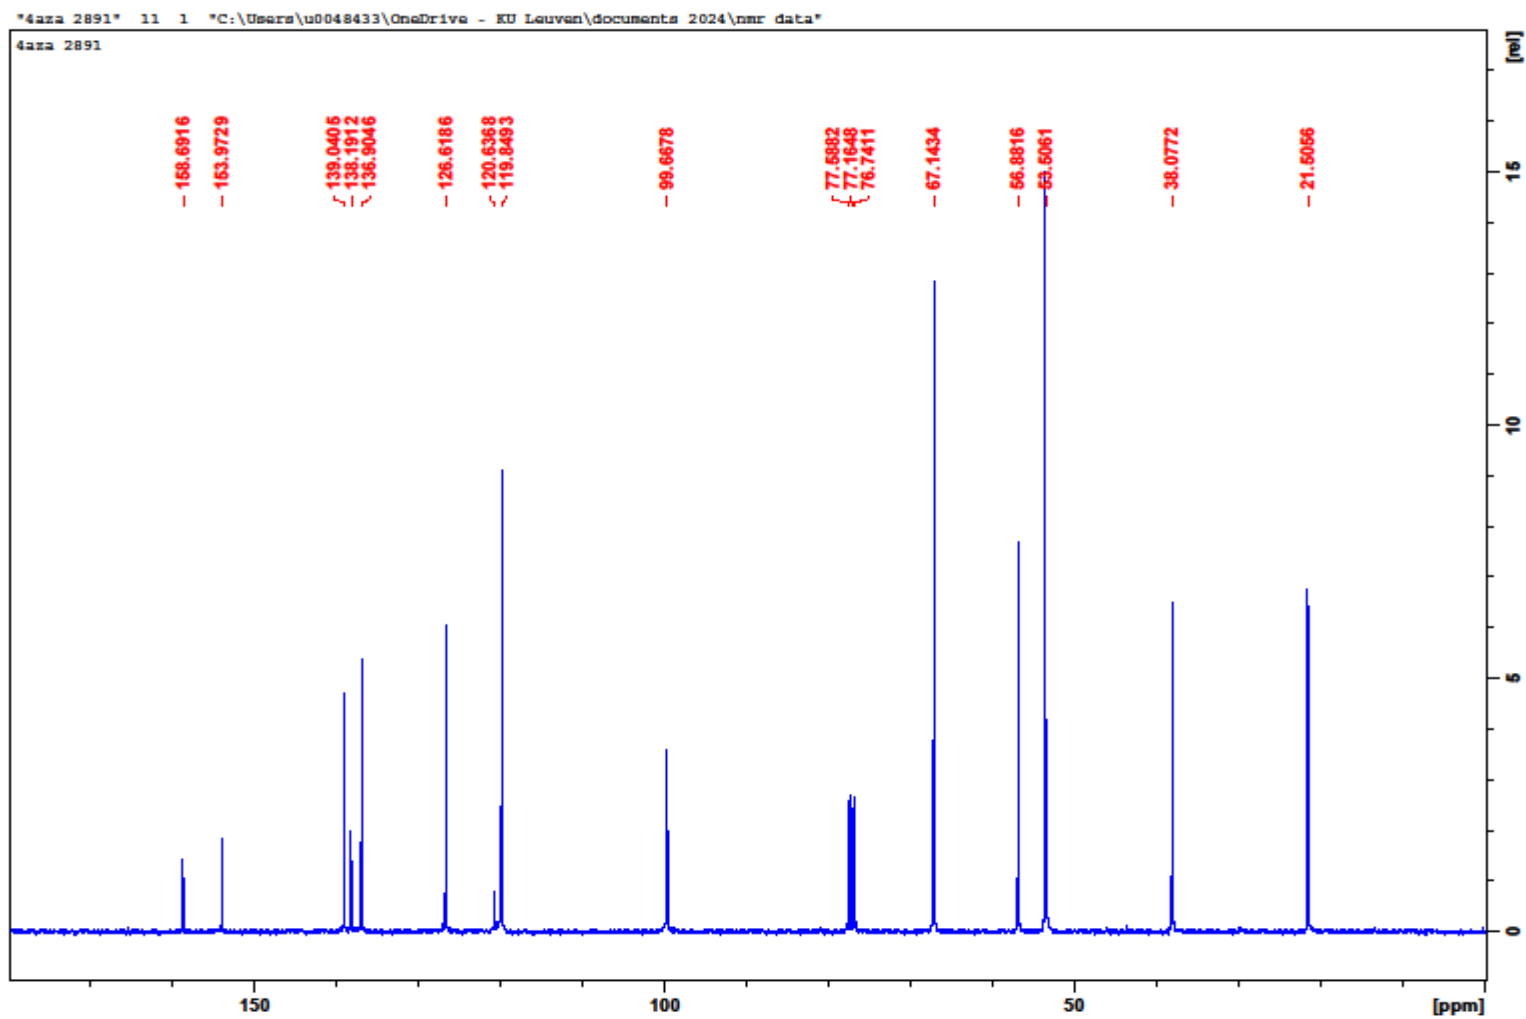

E

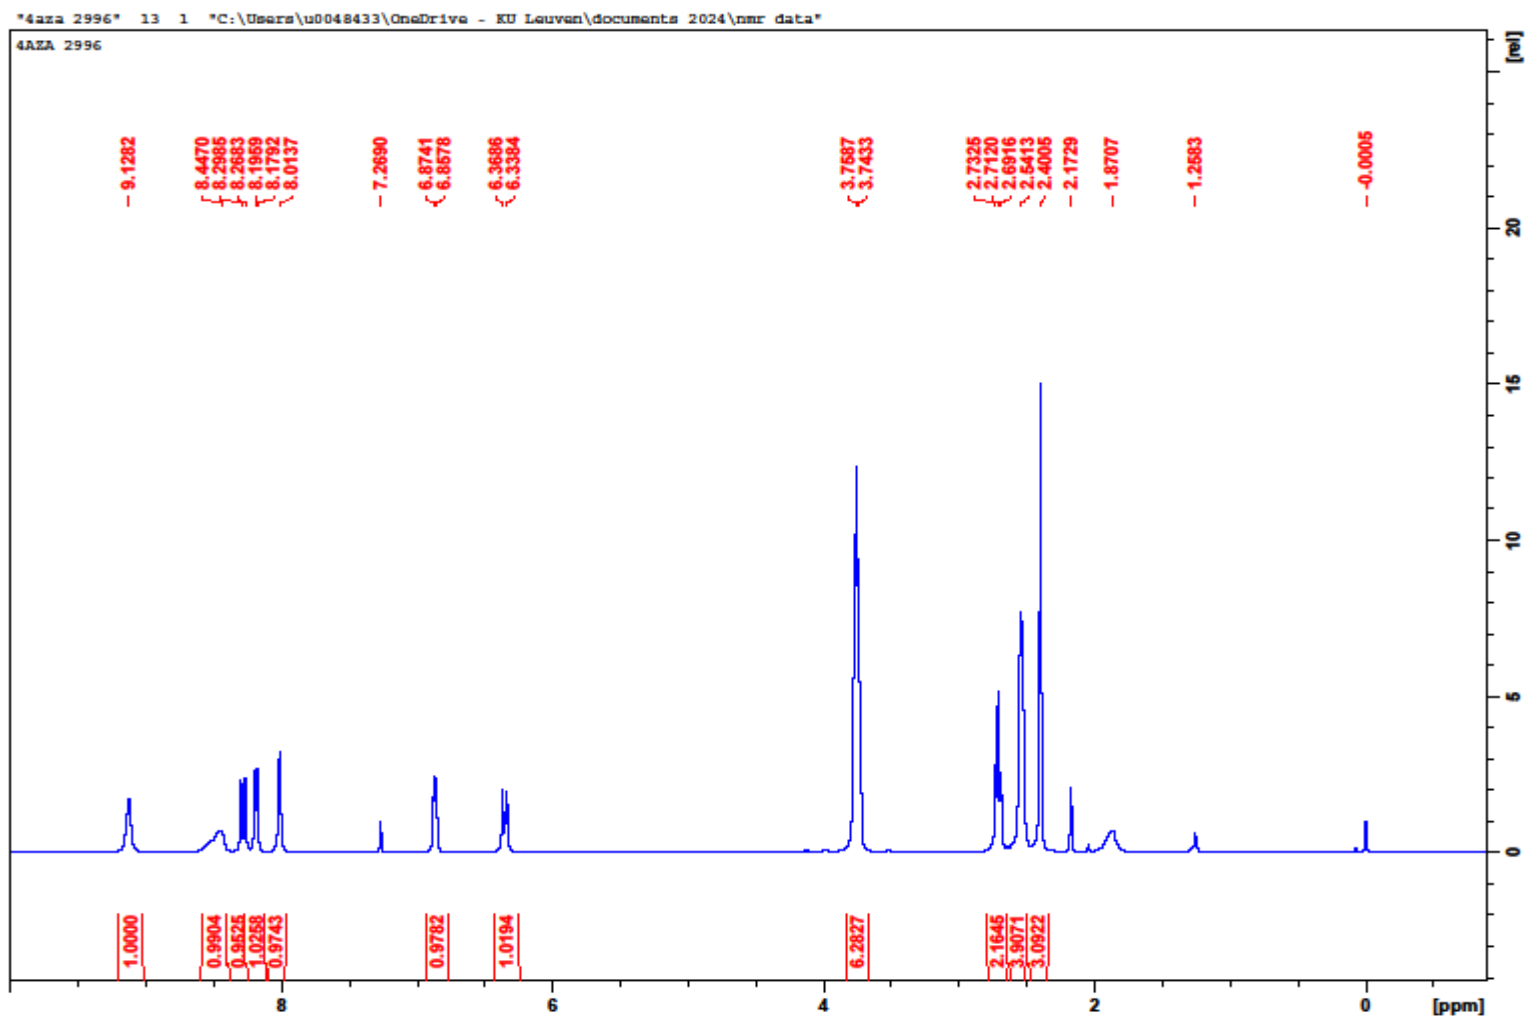

F

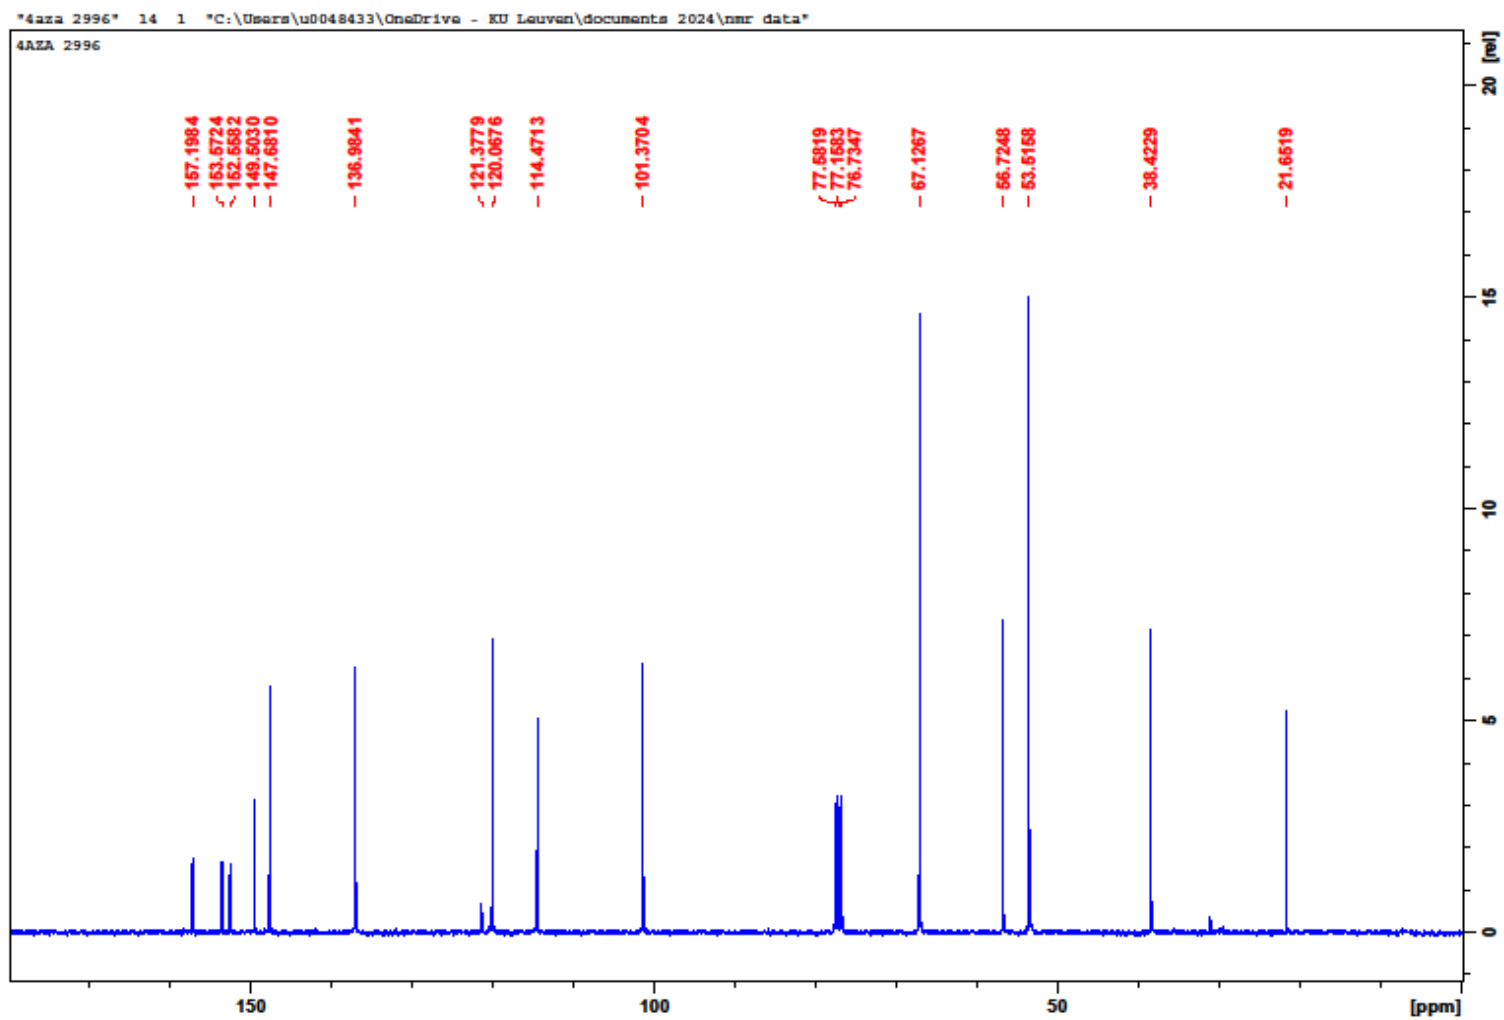

Supplement: pone.0307153.s002.pdf [file pone.0307153.s002.pdf]
